# Supplementary material for: The role of Mn doping in CeO2 for catalytic synthesis of aliphatic carbamate from CO2
Source: Royal Society of Chemistry journal article supplement (doi:10.1039/c5cy00166h), 2015-01-01
Supplement: c5cy00166h1.pdf [file c5cy00166h1.pdf]

## ***Supporting Information***

### **The Role of MnO<sub>x</sub> Doped in CeO<sub>2</sub> for Catalytic Synthesis of Aliphatic Carbamate from CO<sub>2</sub>**

Ran Zhang, Li Guo, Chen Chen, Jizhong Chen, Angjun Chen, Xiuge Zhao,  
Xuerui Liu, Yuhe Xiu, Zhenshan Hou\*

Key Laboratory for Advanced Materials, Research Institute of Industrial Catalysis,  
East China University of Science and Technology, Shanghai, 200237, China.

E-mail: houzhenshan@ecust.edu.cn

Table S1. Relative molar sensitivity of all the products toward toluene (internal standard)

| Reactants or products     | Relative molar sensitivity |
|---------------------------|----------------------------|
| <i>n</i> -butylamine (BA) | 1.68                       |
| Dibutylurea (DBU)         | 2.51                       |
| dimethyl carbonate (DMC)  | 3.33                       |
| N-butylcarbamate (NBCB)   | 2.05                       |

Table S2 The catalytic performance with the different ratios of BA to catalyst over MnO<sub>x</sub>(0.03)-CeO<sub>2</sub> catalyst<sup>a</sup>

| Entry | Sub./Cat. (molar ratio) | Conv. (%) | Sel. <sub>NBCB</sub> (%) | Sel. <sub>DBU</sub> (%) |
|-------|-------------------------|-----------|--------------------------|-------------------------|
| 1     | 3                       | 81.8      | 68.1                     | 31.9                    |
| 2     | 4                       | 79.1      | 67.3                     | 32.7                    |
| 3     | 9                       | 61.8      | 60.7                     | 39.3                    |

<sup>a</sup>Reaction condition: BA: CH<sub>3</sub>OH = 5 mmol : 200 mmol, t = 16 h, T = 170 °C, P = 5.0 MPa

Table S3 The catalytic performance with the different ratios of BA to CH<sub>3</sub>OH over MnO<sub>x</sub>(0.03)-CeO<sub>2</sub> catalyst<sup>a</sup>

| Entry | BA/CH <sub>3</sub> OH (molar ratio) | Conv. (%) | Sel. <sub>NBCB</sub> (%) | Sel. <sub>DBU</sub> (%) |
|-------|-------------------------------------|-----------|--------------------------|-------------------------|
| 1     | 5:100                               | 80.6      | 53.7                     | 46.3                    |
| 2     | 5:200                               | 86.5      | 74.5                     | 25.5                    |
| 3     | 5:400                               | 88.4      | 87.4                     | 12.6                    |
| 4     | 5:500                               | 91.1      | 89.3                     | 10.7                    |
| 5     | 5:600                               | 91.3      | 92.7                     | 7.3                     |

<sup>a</sup>Reaction condition: BA: 5 mmol, t = 8 h, T = 170 °C, P = 5.0 MPa, 0.3 g catalyst.

Table S4 BET surface area of CeO<sub>2</sub>-based catalysts

| Entry          | Catalyst                                           | BET surface /m <sup>2</sup> ·g <sup>-1</sup> |
|----------------|----------------------------------------------------|----------------------------------------------|
| 1              | Lab-com                                            | 8.0                                          |
| 2              | Lab-CeO <sub>2</sub>                               | 31.7                                         |
| 3 <sup>a</sup> | The spent Lab-CeO <sub>2</sub>                     | 24.1                                         |
| 4              | MnO <sub>x</sub> (0.03)-CeO <sub>2</sub>           | 68.2                                         |
| 5 <sup>a</sup> | The spent MnO <sub>x</sub> (0.03)-CeO <sub>2</sub> | 52.9                                         |
| 6              | MnO <sub>x</sub>                                   | 14.9                                         |

<sup>a</sup>The BET surface area was measured after four catalytic recycles.

Table S5 The reaction of methanol with CO<sub>2</sub> over CeO<sub>2</sub>-based catalysts<sup>a</sup>

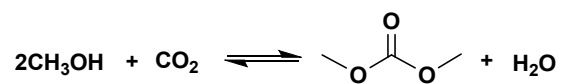

| Entry | Catalyst                                 | Reactants /mmol    |                 | n <sub>DMC</sub> |
|-------|------------------------------------------|--------------------|-----------------|------------------|
|       |                                          | CH <sub>3</sub> OH | CO <sub>2</sub> | /mmol            |
| 1     | Lab-CeO <sub>2</sub>                     | 500                | 5 MPa           | 0.21             |
| 2     | MnO <sub>x</sub> (0.03)-CeO <sub>2</sub> | 500                | 5 MPa           | 0.28             |

<sup>a</sup>Reaction condition: T = 170 °C, P = 5.0 MPa, t = 8 h, catalyst 0.3 g. <sup>b</sup>DMC was detected as a sole product.

Table S6 The carbonylation of BA with DMC under the pressure of N<sub>2</sub> or CO<sub>2</sub><sup>a</sup>.

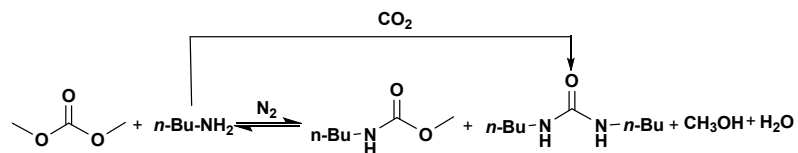

| Entry          | Catalyst                                 | Atmosphere      | Reactants /mmol |                  | Products /mmol   |                   |
|----------------|------------------------------------------|-----------------|-----------------|------------------|------------------|-------------------|
|                |                                          |                 | n <sub>BA</sub> | n <sub>DMC</sub> | n <sub>DBU</sub> | n <sub>NBCB</sub> |
| 1              | MnO <sub>x</sub> (0.03)-CeO <sub>2</sub> | N <sub>2</sub>  | 5               | 2.5              | 0.058            | 0.65              |
| <sup>b</sup> 2 | MnO <sub>x</sub> (0.03)-CeO <sub>2</sub> | CO <sub>2</sub> | 5               | 5                | 1.95             | 0.84              |

<sup>a</sup>Reaction condition: CH<sub>3</sub>OH = 500 mmol, T = 170 °C, P = 5.0 MPa, t = 8 h, catalyst 0.3 g. <sup>b</sup>no solvent.

Table S7 Summary of the results of XPS analysis

| Entry | Catalyst                                              | u <sup>'''</sup> /<br>total area | <sup>a</sup> Mn/<br>Mn+Ce | Mn<br>(%) | Ce<br>(%) | O<br>(%) | O distribution |                |                |
|-------|-------------------------------------------------------|----------------------------------|---------------------------|-----------|-----------|----------|----------------|----------------|----------------|
|       |                                                       |                                  |                           |           |           |          | O <sub>L</sub> | O <sub>s</sub> | O <sub>a</sub> |
| 1     | Lab-CeO <sub>2</sub>                                  | 0.126                            | -                         | 0         | 29.1      | 70.9     | 61.5           | 6.9            | 2.5            |
| 2     | the spent Lab-CeO <sub>2</sub>                        | 0.133                            | -                         | 0         | 27.6      | 72.4     | 61.4           | 9.3            | 1.7            |
| 3     | MnO <sub>x</sub> (0.03)-CeO <sub>2</sub>              | 0.125                            | 0.03                      | 1.0       | 32.0      | 67.0     | 60.1           | 5.6            | 1.3            |
| 4     | the spent MnO <sub>x</sub><br>(0.03)-CeO <sub>2</sub> | 0.126                            | 0.037                     | 1.2       | 29.8      | 69.0     | 57.6           | 8.8            | 2.6            |

<sup>a</sup> The values estimated by XPS analysis; The ICP value of Mn/Mn+Ce was 0.03

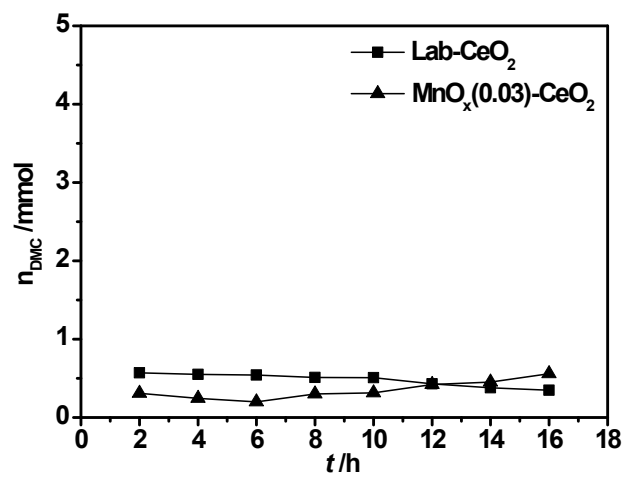

Figure S1 The  $n_{\text{DMC}}$  versus time profile over Lab- $\text{CeO}_2$  (A) and  $\text{MnO}_x(0.03)\text{-CeO}_2$  (B) catalysts. Reaction condition: BA:  $\text{CH}_3\text{OH}$  = 5 mmol : 200 mmol,  $T = 170\text{ }^\circ\text{C}$ ,  $P = 5.0\text{ MPa}$ , catalyst 0.3 g.



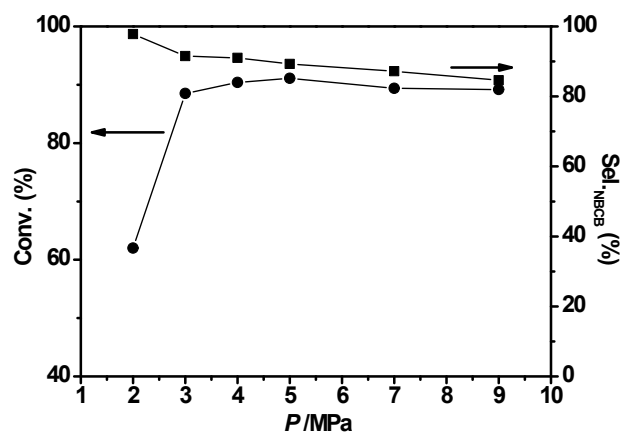

Figure S2 The effect of pressure on the reaction of BA+CO<sub>2</sub>+CH<sub>3</sub>OH over the MnO<sub>x</sub>(0.03)-CeO<sub>2</sub> catalyst. Reaction condition: BA: CH<sub>3</sub>OH = 5 mmol : 500 mmol, T = 170 °C, t = 8 h, catalyst 0.3 g.

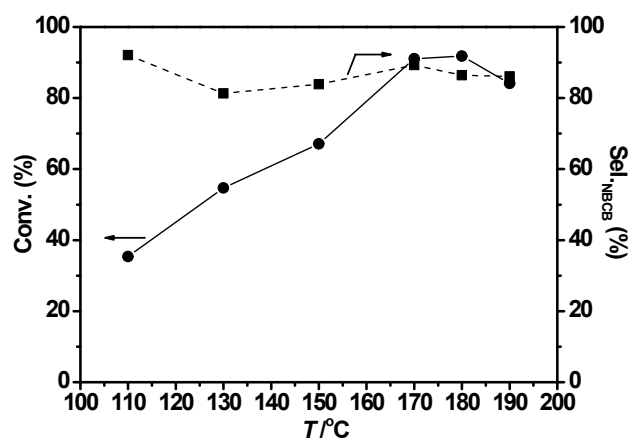

Figure S3 The effect of temperature in the reaction of BA+CO<sub>2</sub>+CH<sub>3</sub>OH over the MnO<sub>x</sub> (0.03)-CeO<sub>2</sub> catalyst. Reaction condition: BA: CH<sub>3</sub>OH = 5 mmol : 500 mmol, P = 5 MPa, t = 8 h, catalyst 0.3 g.

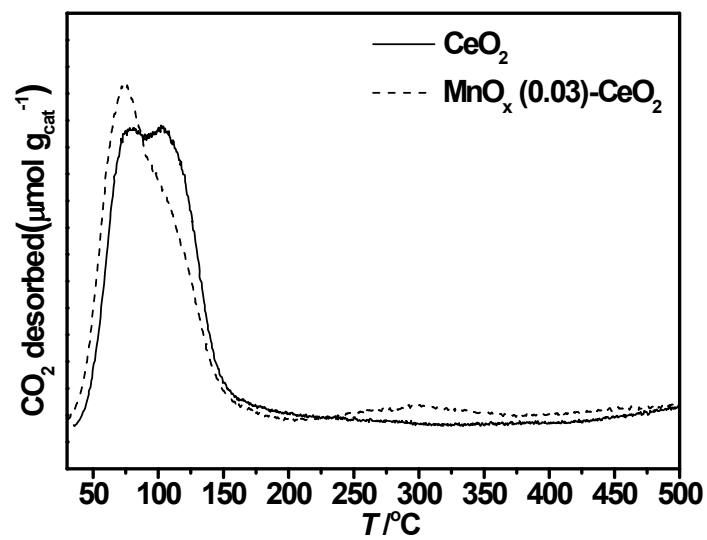

Figure S4 CO<sub>2</sub>-TPD profiles of Lab-CeO<sub>2</sub> (solid line) and MnO<sub>x</sub>(0.03)-CeO<sub>2</sub> (dashed line). Conditions: He 50 ml·min<sup>-1</sup>; CO<sub>2</sub> adsorbed at 25 °C for 30 min.
